# Supplementary material
Source: publisher figshare collection journal article supplement (https://acs.figshare.com/ndownloader/files/9390565)
Supplement: Supplementary file 1 [file 9390565]

## Supporting Information

### **Templated and Catalytic Fabrication of N-doped Hierarchical Porous Carbon-Carbon Nanotubes Hybrids as Host for Lithium–Sulfur Batteries**

Junjie Cai<sup>a, b,\*</sup>, Chun Wu<sup>b</sup>, Shaoran Yang<sup>b</sup>, Ying Zhu<sup>b</sup>, Pei Kang Shen<sup>c,\*</sup>, Kaili Zhang<sup>b,d,\*</sup>

a School of Materials and Energy, Center of Emerging Material and Technology, Guangdong University of Technology, Guangzhou 510006, China

b Department of Mechanical and Biomedical Engineering, City University of Hong Kong, 83 Tat Chee Avenue, Hong Kong

c Collaborative Innovation Center of Sustainable Energy Materials, Guangxi University, Nanning 530004, China.

d Shenzhen Research Institute, City University of Hong Kong, Shenzhen 518057, China.

\* Corresponding author: lae0cai@live.com pkshen@gxu.edu.cn and kaizhang@cityu.edu.hk.

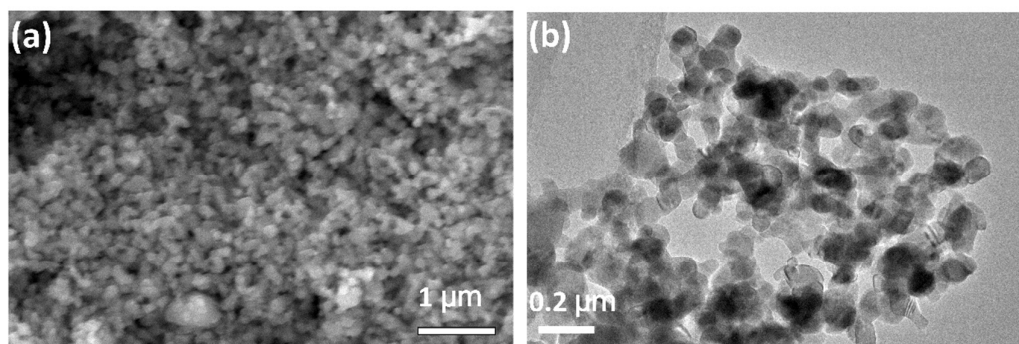

Figure S1. SEM (a) and TEM (b) images of nano-CaCO<sub>3</sub>.

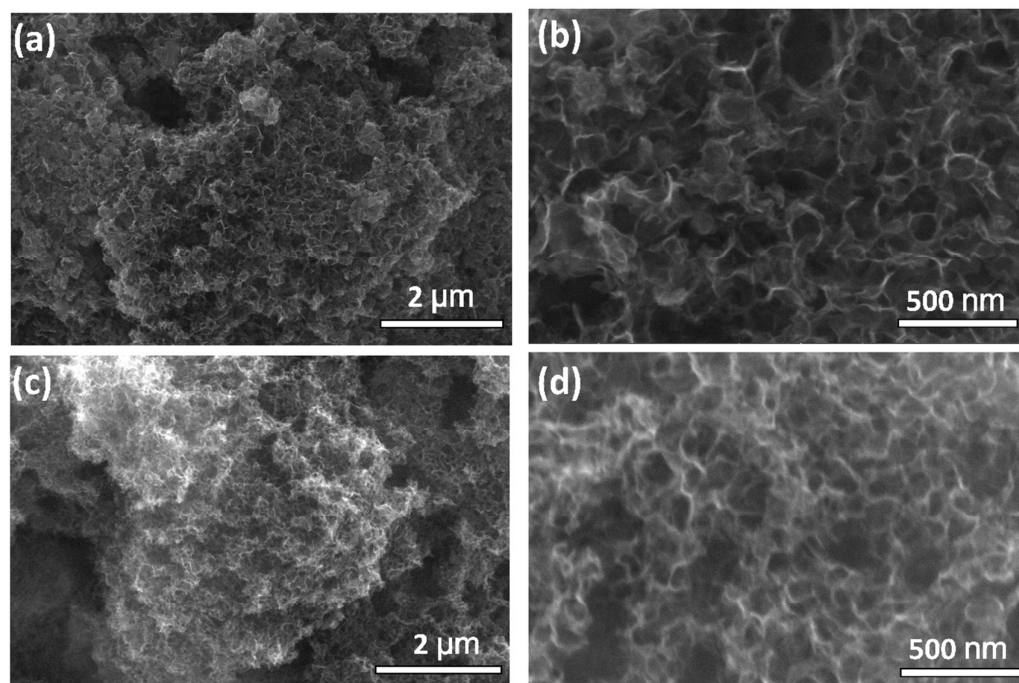

Figure S2. SEM images of N-HPC synthesized with different amount of nano-CaCO<sub>3</sub>: (a-b) 4.5g; and (c-d) 7.5g.

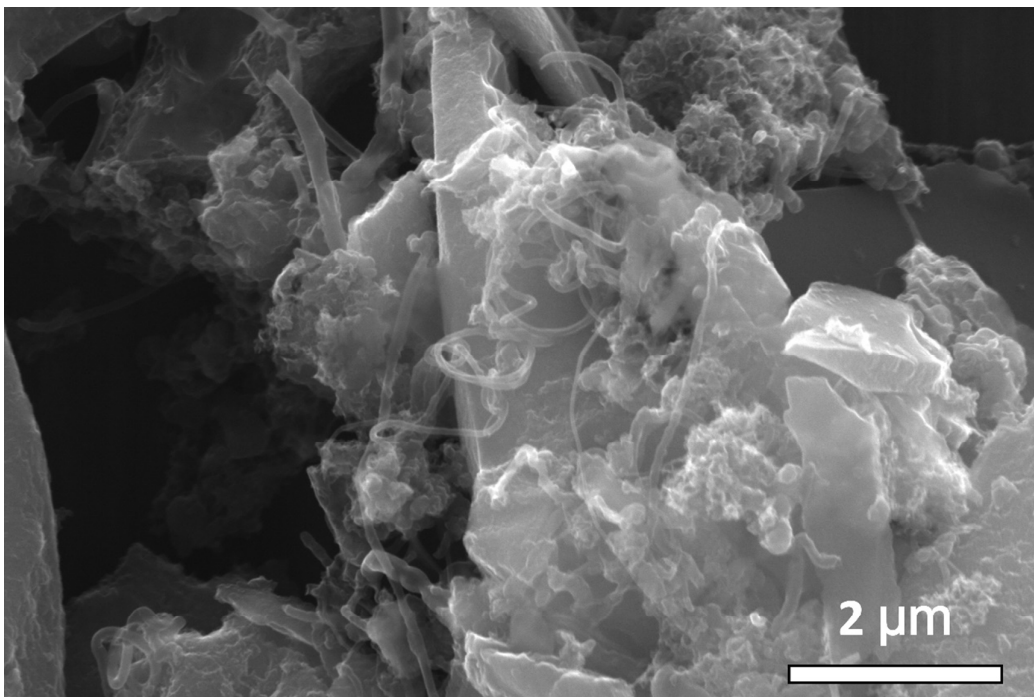

Figure S3. SEM images of N-HPC-CNTs synthesized without nano- $\text{CaCO}_3$ .

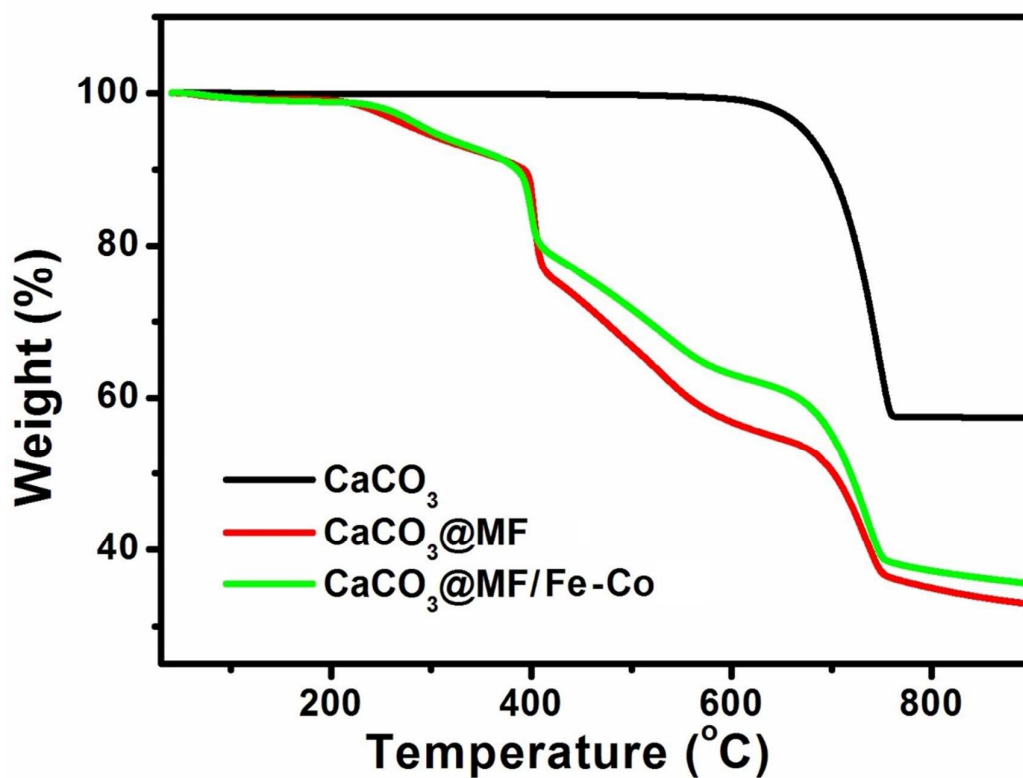

Figure S4. TGA curves of  $\text{CaCO}_3$ ,  $\text{CaCO}_3@MF$  and  $\text{CaCO}_3@MF/Fe-Co$  under argon atmosphere.

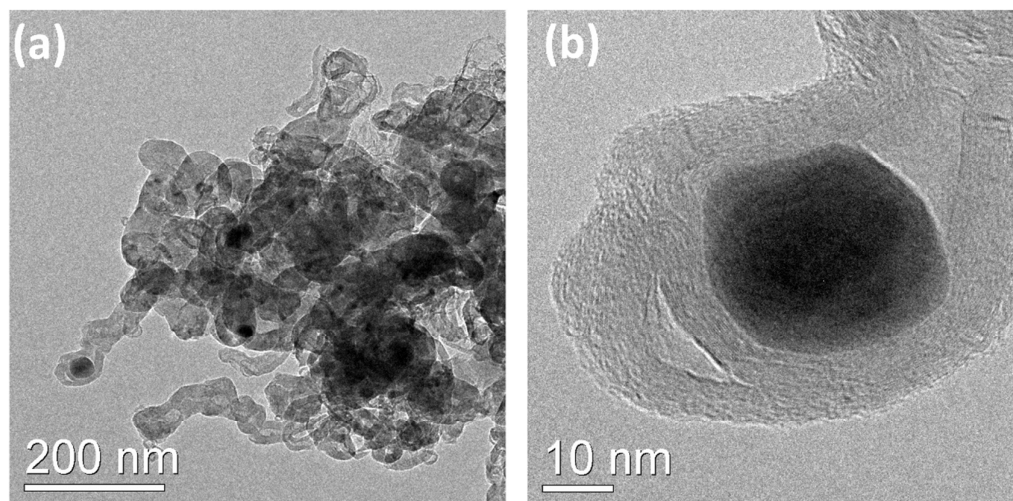

Figure S5. SEM image of N-HPC-CNTs that metal catalyst encapsulated in the tip of CNT (a-b).

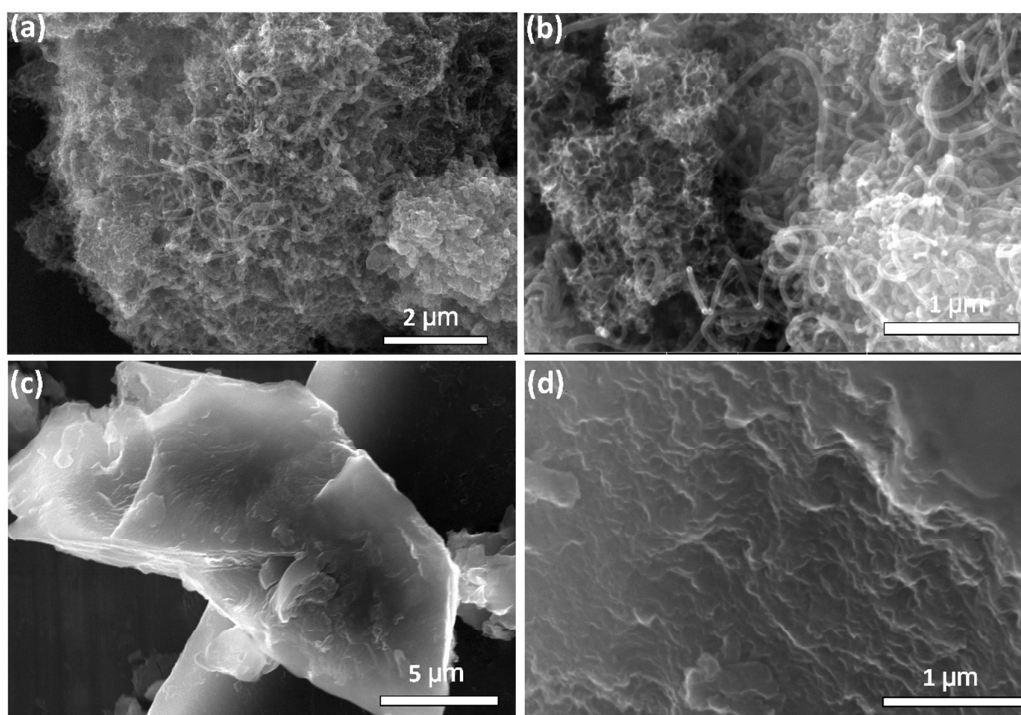

Figure S6. SEM image of SEM images of (a-b) N-HPC-CNTs hybrids (60 mg of catalyst) with exposed HPC; (c-d) N-HPC prepared at 700 °C.



|            | CaCO <sub>3</sub> (g) | Fe-Co (mg) | S <sub>BET</sub> (m <sup>2</sup> g <sup>-1</sup> ) | V <sub>total</sub> (cm <sup>3</sup> g <sup>-1</sup> ) |
|------------|-----------------------|------------|----------------------------------------------------|-------------------------------------------------------|
| N-HPC      | 4.5                   | 0          | 320                                                | 0.94                                                  |
|            | 6.5                   | 0          | 687                                                | 1.64                                                  |
|            | 7.5                   | 0          | 561                                                | 1.31                                                  |
| N-HPC-CNTs | 6.5                   | 20         | 587                                                | 1.05                                                  |
|            | 6.5                   | 60         | 651                                                | 1.19                                                  |
|            | 6.5                   | 100        | 593                                                | 1.06                                                  |

Table S1. BET surface areas and pore volume of different samples.

|            | CaCO <sub>3</sub> (g) | Fe-Co (mg) | C (wt.%) | N (wt.%) | O (wt.%) |
|------------|-----------------------|------------|----------|----------|----------|
| N-HPC      | 4.5                   | 0          | 89.7     | 7.4      | 2.9      |
|            | 6.5                   | 0          | 90.0     | 5.3      | 4.6      |
|            | 7.5                   | 0          | 93.2     | 2.9      | 2.7      |
| N-HPC-CNTs | 6.5                   | 20         | 94.7     | 2.3      | 3.1      |
|            | 6.5                   | 60         | 94.9     | 1.7      | 3.4      |
|            | 6.5                   | 100        | 95.4     | 1.2      | 3.4      |

Table S2. Element compositions determined by XPS.

|            | Pyridinic-N (%) | Pyrrolic-N (%) | Graphitic-N (%) | Oxidized pyridinic-N (%) |
|------------|-----------------|----------------|-----------------|--------------------------|
| N-HPC      | 28.3            | 23.8           | 36.3            | 11.6                     |
| N-HPC-CNTs | 14.6            | 7.7            | 53.1            | 24.6                     |

Table S3. The integral area and fractions of different nitrogen species derived from figure 5d.

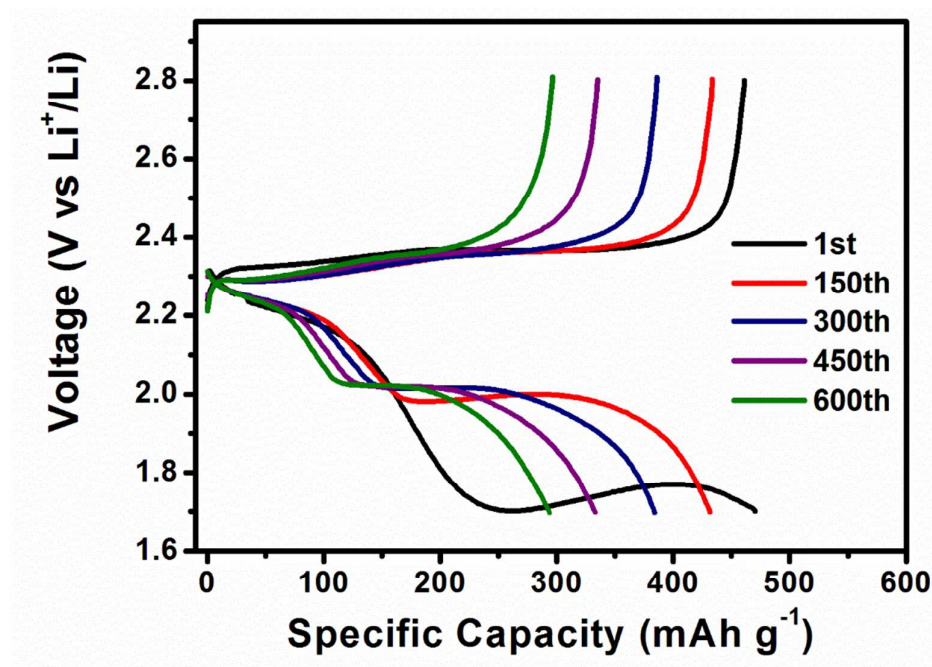

Figure S7. Galvanostatic charge/discharge curves of N-HPC-CNTs/S with 76.4 wt%.

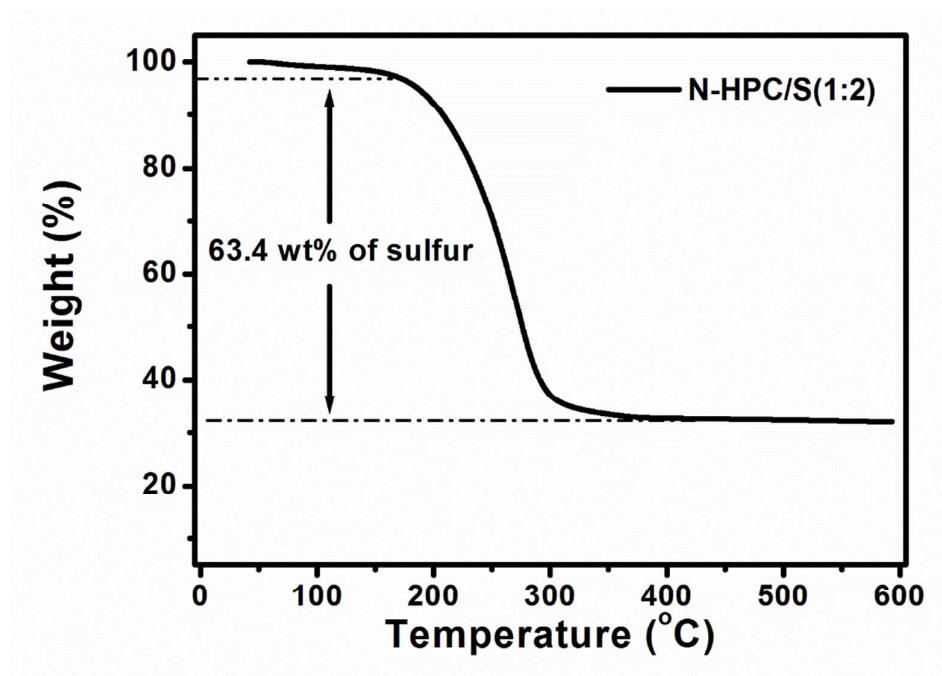

Figure S8. TGA curves of N-HPC/S cathode prepared by using mass ratio of carbon to sulfur is 1:2.

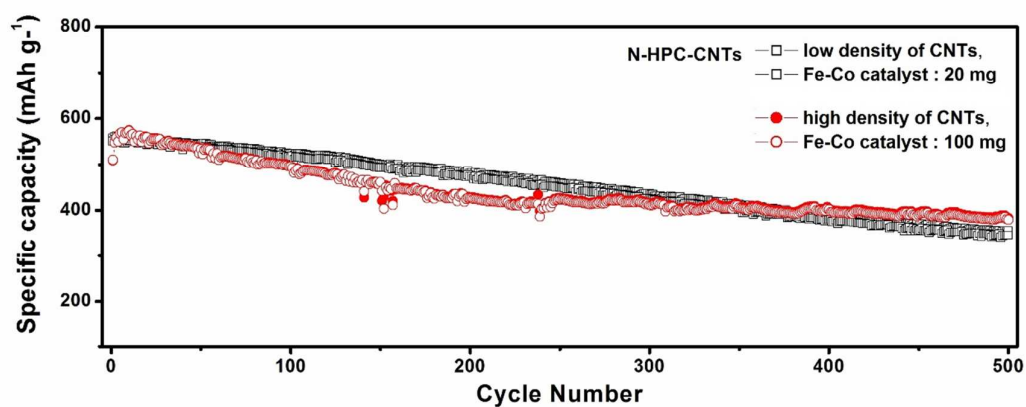

Figure S9. Cycling performance of N-HPC-CNTs/S (1:2) samples with low density (prepared by 20 mg of catalyst) and high density (prepared by 100 mg of catalyst) of CNTs.

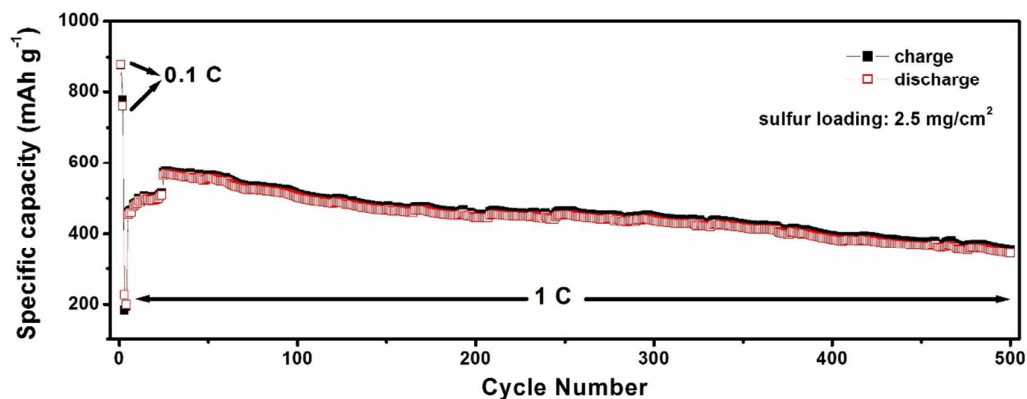

Figure S10. Long-term cycling performance of the N-HPC-CNTs/S with 62.8 wt% and the sulfur loading of the electrode is approximately 2.5 mg/cm<sup>2</sup>.

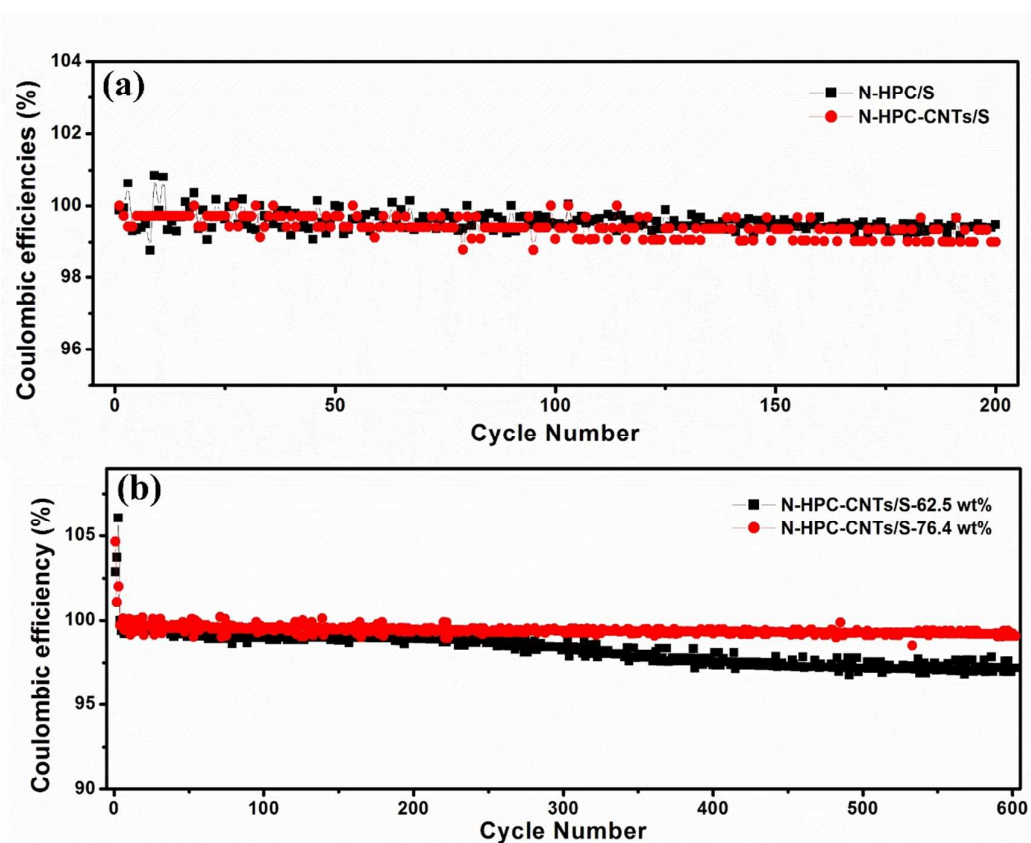

Figure S11. Coulombic efficiencies of (a) N-HPC/S and N-HPC-CNTs/S prepared by a same mass ratio of carbon to sulfur (1:2) at a current rate of 0.5 C; (b) N-HPC-CNTs/S with 62.8 wt% and 76.4 wt% sulfur content at a current density of 1 C.

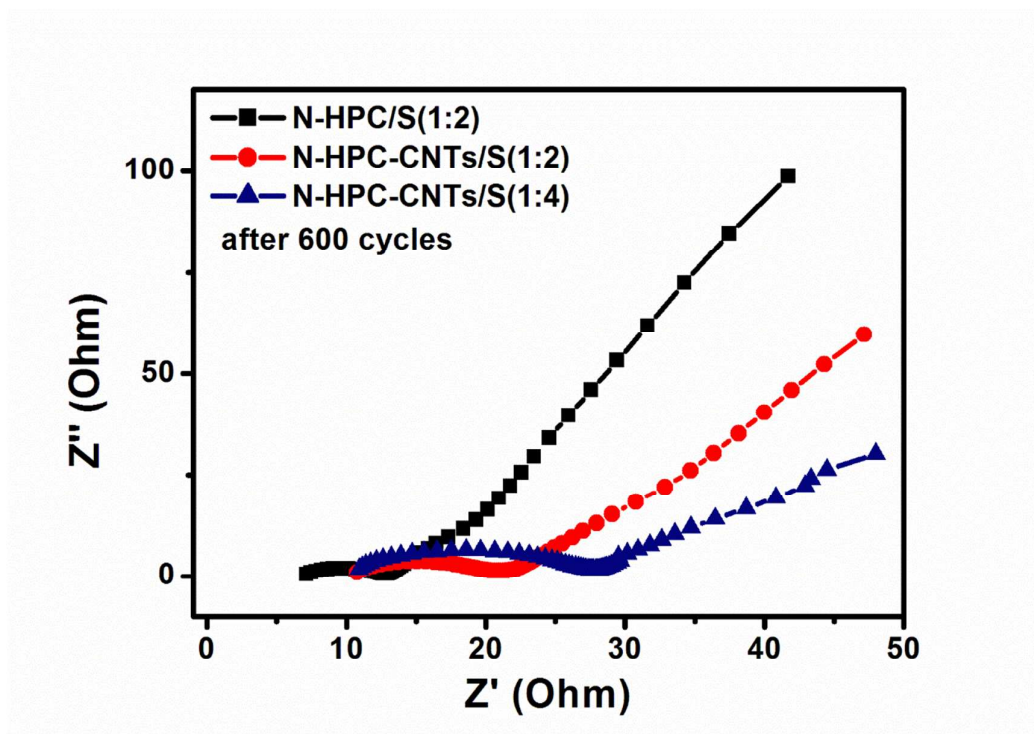

Figure S12. Nyquist plots from EIS of three samples after 600 cycles.
